1 Omicron-specific mRNA vaccine induced potent neutralizing antibody against Omicron but not other  
2 SARS-CoV-2 variants

3

4 I-Jung Lee<sup>1,2#</sup>, Cheng-Pu Sun<sup>1#</sup>, Ping-Yi Wu<sup>1#</sup>, Yu-Hua Lan<sup>1</sup>, I-Hsuan Wang<sup>1</sup>, Wen-Chun Liu<sup>3</sup>, Sheng-Che  
5 Tseng<sup>1</sup>, Szu-I Tsung<sup>1,2</sup>, Yu-Chi Chou<sup>3</sup>, Monika Kumari<sup>4</sup>, Yu-Wei Chang<sup>3</sup>, Hui-Feng Chen<sup>3</sup>, Yin-Shiou Lin<sup>3</sup>,  
6 Tsung -Yen Chen<sup>3</sup>, Chi-Wen Chiu<sup>1,5</sup>, Chung-Hsuan Hsieh<sup>1,5</sup>, Cheng-Ying Chuang<sup>1</sup>, Chih-Chao Lin<sup>3</sup>,  
7 Chao-Min Cheng<sup>3</sup>, Hsiu-Ting Lin<sup>4</sup>, Wan-Yu Chen<sup>4</sup>, Po-Cheng Chiang<sup>3</sup>, Chong-Chou Lee<sup>3</sup>, James C.  
8 Liao<sup>6</sup>, Han-Chung Wu<sup>3,4</sup>, Mi-Hua Tao<sup>1,2,3,5</sup>

9

10 1 Institute of Biomedical Sciences, Academia Sinica, Taipei, Taiwan

11 2 Graduate Institute of Microbiology, College of Medicine, National Taiwan University, Taipei, Taiwan

12 3 Biomedical Translation Research Center, Academia Sinica, Taipei, Taiwan

13 4 Institute of Cellular and Organismic Biology, Academia Sinica, Taipei, Taiwan

14 5 Department of Clinical Laboratory Science and Medical Biotechnology, National Taiwan University,

15 Taipei, Taiwan

16 6 Institute of Biological Chemistry, Academia Sinica, Taipei, Taiwan

17

18 # These authors contributed equally

19

20 Corresponding author.

21 Dr. Mi-Hua Tao

22 Institute of Biomedical Sciences, Academia Sinica

23 No. 128, Academia Road, Section 2, Nangang, Taipei 11529, Taiwan

24 E-mail: [bmtao@ibms.sinica.edu.tw](mailto:bmtao@ibms.sinica.edu.tw)

25

26

## Abstract

27       The emerging SARS-CoV-2 variants of concern (VOC) harbor mutations associated with increasing  
28 transmission and immune escape, hence undermine the effectiveness of current COVID-19 vaccines. In  
29 late November of 2021, the Omicron (B.1.1.529) variant was identified in South Africa and rapidly  
30 spread across the globe. It was shown to exhibit significant resistance to neutralization by serum not only  
31 from convalescent patients, but also from individuals receiving currently used COVID-19 vaccines with  
32 multiple booster shots. Therefore, there is an urgent need to develop next generation vaccines against  
33 VOCs like Omicron. In this study, we develop a panel of mRNA-LNP-based vaccines using the receptor  
34 binding domain (RBD) of Omicron and Delta variants, which are dominant in the current wave of  
35 COVID-19. In addition to the Omicron- and Delta-specific vaccines, the panel also includes a “Hybrid”  
36 vaccine that uses the RBD containing all 16 point-mutations shown in Omicron and Delta RBD, as well  
37 as a bivalent vaccine composed of both Omicron and Delta RBD-LNP in half dose. Interestingly, both  
38 Omicron-specific and Hybrid RBD-LNP elicited extremely high titer of neutralizing antibody against  
39 Omicron itself, but few to none neutralizing antibody against other SARS-CoV-2 variants. The bivalent  
40 RBD-LNP, on the other hand, generated antibody with broadly neutralizing activity against the wild-type  
41 virus and all variants. Surprisingly, similar cross-protection was also shown by the Delta-specific  
42 RBD-LNP. Taken together, our data demonstrated that Omicron-specific mRNA vaccine can induce  
43 potent neutralizing antibody response against Omicron, but the inclusion of epitopes from other variants  
44 may be required for eliciting cross-protection. This study would lay a foundation for rational development  
45 of the next generation vaccines against SARS-CoV-2 VOCs.

46

47

## Introduction

48       Since the COVID-19 pandemic occurred in late 2019, vaccine has been regarded as a major  
49 approach to combat the disease. Currently, global research and clinical efforts have pushed several United

50 States Food and Drug Administration (U.S. FDA)-approved COVID-19 vaccines for clinical use <sup>1</sup>.  
51 However, the pandemic is still far from over due to the constant emergence of new SARS-CoV-2 variants  
52 of concern (VOC) <sup>2</sup>. Among the earlier identified VOCs, B.1.351 (Beta) exhibited the greatest immune  
53 escape against convalescent sera obtained from COVID-19 patients or vaccinated individuals <sup>3,4</sup>. The  
54 B.1.617.2 (Delta) variant that emerged in early December, 2020, quickly outpaced all other circulating  
55 isolates and showed a significant reduction in vaccine effectiveness. Importantly, acquisition of favorable  
56 mutations in Delta strain enhances transmissibility among individuals and leads to more severe outcomes  
57 <sup>5,6</sup>. In late November 2021, the B.1.1.529 (Omicron) variant was first discovered and rapidly spread  
58 globally. This variant contains novel genomic sequence changes different from any of the previously  
59 defined ancestral or VOC isolates of SARS-CoV-2, including 37 mutations in the spike protein, 15 of  
60 which are located in the RBD <sup>7</sup>. Recent studies have shown that an increase in the number and complexity  
61 of spike mutations leads to inability of therapeutic monoclonal antibodies against Omicron strain <sup>8</sup>.  
62 Furthermore, constellation mutations render Omicron more antigenically distant from ancestral viruses or  
63 other VOCs, leading to reduced antibody neutralizing activity from vaccination or natural infection <sup>7,9</sup>.  
64 Although the disease symptoms induced by Omicron variant are milder than that of Delta <sup>10</sup>, higher  
65 transmission rates may inevitably lead to an increase in case numbers and pose a threat on the public  
66 health and economics of society. Therefore, there is an urgent need to develop a new generation of  
67 vaccines to prevent from VOCs pandemic.

68

69 In this study, we developed monovalent receptor-binding domain (RBD)-based mRNA vaccines  
70 targeting on two currently major predominant VOCs, Omicron and Delta. We also tested the concept of  
71 bivalent vaccines containing both Delta and Omicron RBD, and a Hybrid vaccine, which combined the  
72 mutation sites of Delta and Omicron in single RBD construct since multivalent vaccines containing  
73 various SARS-CoV-2 VOC antigens are recommended to effectively control the spread of SARS-CoV-2  
74 variants according to the recommendations of the WHO Technical Advisory Group on COVID-19

75 Vaccine Components (TAG-CO-VAC). Using pseudovirus neutralization assays, we found that serum  
76 samples from the Omicron vaccinated mice can effectively neutralize Omicron, but not the wild-type  
77 (D614G), or other VOCs (Beta and Delta) of SARS-CoV-2. In contrast, the Omicron/Delta bivalent  
78 mRNA vaccine elicited broadly cross-reactive neutralizing antibodies, effectively neutralizing Omicron  
79 and other VOCs. Taken together, our data demonstrate that a new generation of multivalent COVID-19  
80 mRNA vaccine is a viable approach to prevent infection from ancestral or VOCs of SARS-CoV-2.

81

## 82 **Results**

### 83 *Design and encapsulation of mRNA encoding variant RBD*

84 To cope with the emergence of new variants, 4 different mRNA vaccines were designed to encode  
85 the SARS-CoV-2 spike receptor-binding domain (RBD) region of wild-type (WT, Wuhan strain), Delta,  
86 Omicron, and Omicron with additional L452R mutation (named Hybrid), respectively. The RNA  
87 constructs with mutation sites were summarized in figure 1A. The *in vitro* transcription reaction was used  
88 to synthesize mRNA and the fragment analysis was conducted to analyze RNA integrity. Four synthesized  
89 RNA had expected length (around 1000nt) and showed great integrity with 93% or 94% of intact RNA  
90 and only limited amounts of degraded transcripts (Fig 1B and Sup 1). The mRNA was then transfected to  
91 293T cells for RBD expression examination. Two days post transfection, supernatants were collected and  
92 cocultured with 293T cells that stably expressed human angiotensin-converting enzyme 2 (293T-hACE2)  
93 to conduct binding assay. The bound RBD was then detected by polyclonal anti-RBD antibodies. All WT,  
94 Delta, Omicron, and Hybrid RBD mRNA efficiently expressed RBD with around 99% of cells stained  
95 positive in each construct. Also, we assessed the ability of expressed RBD to bind mouse ACE2 as  
96 previous study had shown that RBD of Omicron variant gained the ability to bind mouse ACE2<sup>7</sup>. In this  
97 case, 3T3 cells that stably expressed mouse ACE2 were used. In contrast to WT and Delta RBD, which  
98 showed no binding capacity against mouse ACE2, RBD from Omicron and Hybrid mRNA transfected

99 supernatants efficiently bound to mouse ACE2 (Fig 1C). The synthesized mRNAs were then packaged  
100 into lipid nanoparticle (LNP) to get WT, Delta, Omicron, and Hybrid RBD-LNP vaccines. In addition to  
101 these 4 constructs, we also formulated half dose of both Delta and Omicron mRNAs into the same LNP at  
102 1:1 ratio to get bivalent RBD-LNP vaccine (Fig 1D). Dynamic light scattering (DLS) measurement  
103 showed that the average size of these LNP ranged between 86 nm and 99 nm with a narrow distribution  
104 (pdI around 0.121 to 0.147). The zeta potential was about 6 - 9 mV (Sup 2). We also examined the RBD  
105 expression capacity of these RBD-LNP by transfection into 293T cells. Two days post transfection,  
106 supernatants were collected and cocultured with 293T-hACE2 cells to conduct binding assay. All 5  
107 RBD-LNP vaccine efficiently expressed RBD with around 99% of cells stained positive in each group  
108 (Fig 1D).

109

#### 110 *Immunogenicity of various RBD-LNP vaccine*

111 Next, we assessed the ability of various RBD-LNP vaccine to generate neutralizing antibody  
112 responses. Group of BALB/c mice were immunized intramuscularly with WT, Delta, Omicron, Hybrid,  
113 and bivalent RBD-LNP for 2 times at 2-week interval. Serum samples were collected 1 week post second  
114 immunization and subjected to SARS-CoV-2 pseudovirus neutralization assay. The neutralization curves  
115 were shown at the left panel and the 50% neutralizing titer (NT50) values were summarized at right (Fig  
116 2). Sera that collected from mice immunized with WT vaccine showed great neutralizing capacity against  
117 D614G, Beta, and Delta variants of SARS-CoV-2 pseudovirus with mean NT50 about 6,400, 3,000, and  
118 4,000, respectively. However, the neutralization capacity was significant lower against Omicron variant  
119 with about 8-fold decline (mean NT50 about 503). On the contrary, the Omicron RBD-LNP vaccine  
120 showed extremely high neutralizing antibodies against Omicron variant with mean NT50 about 18,600  
121 but failed to neutralize other tested SARS-CoV-2 variants. The bivalent RBD-LNP, which contained half  
122 dose of both Delta RBD mRNA and Omicron RBD mRNA, generated high titer of neutralizing antibodies  
123 against all D614G, Beta, Delta, and Omicron variants with mean NT50 about 8,600, 1,700, 10,500, and

l24 4,000, respectively. Surprisingly, Delta RBD-LNP also showed high titer of neutralizing antibodies  
l25 against all D614G, Beta, Delta, and Omicron variants with mean NT50 about 11,700, 2,200, 17,800, and  
l26 4,000, respectively. The Hybrid RBD-LNP showed extremely high titer of neutralizing antibodies against  
l27 Omicron variant with mean NT50 about 21,100 but low neutralizing antibody titer against other tested  
l28 variants (mean NT50 about 300 against D614G, 500 against Beta, and 400 against Delta variants). Taken  
l29 together, we found that Omicron RBD-LNP vaccine could generate potent neutralizing antibody  
l30 responses against Omicron variant but had no neutralizing capacity against other variants. By contrast, the  
l31 bivalent RBD-LNP vaccine or the Delta RBD-LNP vaccine could generate broad neutralizing antibody  
l32 responses against ancestral SARS-CoV-2 virus and variants.

l33

l34

## Discussion

l35 Recently, several studies analyzing the sera from vaccinated or convalescent subjects revealed that  
l36 the major antigenic shift of Omicron variant lead to immune evasion<sup>7,11-13</sup>. By using vaccinated mouse  
l37 model which provided an identical genetic background and immune profile, we fairly assessed the  
l38 neutralizing antibody response induced by various RBD mRNA-LNP vaccines. Our data showed that WT  
l39 vaccine can induce high neutralization titers against D614G, Beta, and Delta variants (Fig 2A), but only  
l40 caused a marginal effect (7.8% of D614G) to Omicron variant (Fig 2A). The loss of WT  
l41 vaccine-mediated immunity against Omicron may be due to the loss of epitopes critical for neutralizing  
l42 antibody recognition since it has been reported that mutations on Omicron variant such as K417N, G446S,  
l43 E484A, and Q493R impaired a large panel of monoclonal antibodies under commercial development  
l44<sup>7,8,14,15</sup>. In addition, a cross-variant protection of WT vaccine against Omicron still existed (Fig 2A),  
l45 indicating that certain conserved epitopes shared by WT and Omicron may confer neutralization effect,  
l46 despite low immunogenic and limited protection to Omicron. However, we do not know whether  
l47 Omicron-specific vaccine can induce such an immune response in people who have been immunized with

l48 vaccines based on ancestral SARS-CoV-2 strain. To answer this question, immunoanalysis by using mice  
l49 received heterologous WT/Omicron prime-boost vaccination is needed.

l50

l51 To efficiently prevent Omicron pandemic, we generated an Omicron-specific vaccine which can  
l52 elicit extremely high neutralizing antibody titers against Omicron itself but failed to neutralize other  
l53 SARS-CoV-2 variants (Fig 2C). However, at present, Delta is still another dominant variant associated  
l54 with more severe illness, making up 28% of all cases as of 22nd Jan (COVID-19 Weekly Epidemiological  
l55 Update, 75th edition). To simultaneously prevent spread of Delta and Omicron, we designed a bivalent  
l56 vaccine which contained both RBD-LNPs in half dose. Our data showed that combinatorial vaccination  
l57 generated broadly neutralizing activity (Fig 2E). Although the neutralizing activity elicited by bivalent  
l58 vaccine was lower than that generated by the full dose Omicron vaccine (Fig 2C) or Hybrid vaccine (Fig  
l59 2D), perhaps because of Omicron RBD dose halved, bivalent vaccine is still a potent strategy to increase  
l60 the breadth and potency of vaccine. In the future, different Delta/Omicron RBD-LNP ratios can be tested  
l61 for improvement of vaccine effectiveness. To our surprise, monovalent Delta RBD-LNP also showed  
l62 cross-strains immunity against Omicron (Fig 2B). Since a recent study reported that Delta virus infection  
l63 also induced a cross-variant neutralization of Omicron <sup>16</sup>, it is reasonable to design next generation  
l64 vaccines based on the Delta RBD sequence. Taken together, our data demonstrated that Omicron-specific  
l65 mRNA vaccine induced potent neutralizing antibody response against Omicron but not other  
l66 SARS-CoV-2 variants and lay the foundation for rational development of next generation vaccines  
l67 against SARS-CoV-2 VOCs.

l68

## l69 **Materials and Methods**

### l70 *Ethics statement*

l71 All mouse works were conducted in accordance with the “Guideline for the Care and Use of Laboratory

172 Animals” as defined by the Council of Agriculture, Taiwan and was approved by the Institutional Animal  
173 Care and Use Committee of Academia Sinica (protocol ID: 20-05-1471).

174

#### 175 *Animals*

176 BALB/c mice were purchased from the National Laboratory Animal Center (Taipei, Taiwan) and  
177 maintained in a specific pathogen-free environment in the animal facilities of the Institute of Biomedical  
178 Sciences, Academia Sinica. All experimental procedures were reviewed and approved by the Animal Care  
179 and Use Committee of Academia Sinica.

180

#### 181 *Generation of modified mRNA*

182 DNA templates, which incorporated 5' untranslated regions (UTR)  
183 (GGGAAAUAGAGAGAAAAGAAGAGUAAGAAGAAAUUAAGAGCCACC), signal peptide  
184 sequences from Igk  
185 (ATGGAGACAGACACACTCCTGCTATGGGTACTGCTGCTCTGGGTTCCAGGTTCCACCGGTGA  
186 C), codon optimized wildtype (Wuhan-Hu-1, GenBank YP\_009724390.1), Delta, Omicron, and Omicron  
187 with additional L452R (Hybrid) RBD sequence, 3' UTR  
188 (UGAUAAUAGGCUGGAGCCUCGGUGGCCAUGCUUCUUGCCCCUUGGGCCUCCCCCAGCCC  
189 CUCCUCCCCUCCUGCACCCGUACCCCGUGGUCUUUGAAUAAAGUCUGA), and a poly-A  
190 tail were constructed. Before subjected to the *in vitro* transcription reaction to synthesize mRNA with T7  
191 RNA polymerase (NEB, MA,USA), the DNA template was linearized with EcoRV (NEB, MA,USA). The  
192 *in vitro* transcription reaction included CleanCap®Reagent AG (3' OMe) (Trilink, CA, USA) for  
193 co-transcriptional capping of mRNA and complete replacement of uridine by N1-methyl-pseudouridine  
194 (Trilink, CA, USA). The mRNA was purified by LiCl (Invitrogen, MA, USA) precipitation and dsRNA  
195 was depleted by cellulose (Sigma-Aldrich, MA, USA). Purified RNA was kept frozen at -80 °C until  
196 further use.



197

198 *Fragment analysis*

199 RNA integrity was analyzed by fragment analysis following manufactural protocol (Agilent, CA, USA).  
200 Briefly, mRNA was diluted to 2 ng/μl and mixed with diluent marker. RNA samples and ladder were  
201 denatured at 70°C for 2 minutes and kept on ice before use. The percentage of RNA integrity was  
202 quantified by smear analysis of ProSize Data Analysis Software (Agilent, CA, USA).

203

204 *Preparation of RBD-LNP*

205 The RBD mRNAs were added to an ethanol solution containing a lipid mixture of cationic lipid,  
206 DMG-PEG2000 (MedChemExpress, NJ, USA), 1,2-distearoyl-sn-glycero-3-phosphocholine (DSPC)  
207 (Avanti, NY, USA), and cholesterol (Sigma, MA, USA). The weight ratio of the mRNA and the lipid in  
208 the ethanol solution was 3: 1. The mixtures were subjected to the NanoAssemblr IGNITETM NxGen  
209 Cartridges (Precision NanoSystems, BC, Canada) to produce mRNA-LNP composition, followed by  
210 treatments of dialysis against Dulbecco's phosphate buffered saline (DPBS) (Gibco, MA, USA). The size  
211 and zeta potential of the RBD-LNP were measured by Zetasizer Nano ZS (Malvern Panalytical Ltd.,  
212 Malvern, WR, U.K.).

213

214 *RBD expression and binding assay*

215 The variant-specific RBD mRNA was transfected into 293T cells via lipofectamine (Invitrogen, MA,  
216 USA) and the variant-specific RBD-LNP was transfected by directly added. Cell supernatants were  
217 collected 2 days post transfection. To test the ability of RBD binding to human ACE2 or mouse ACE2,  
218 293T-hACE2 or 3T3-mACE2 cells were harvested and aliquoted into FACS tubes at  $5 \times 10^5$  cells/tube. The  
219 cells were washed with staining buffer (DPBS+1% BCS) and then incubated in 100μl of transfected cell  
220 supernatant at 4°C for 1 hour. After washing, the cells were incubated with anti-RBD polyclonal antibody  
221 (1μg/tube) at 4°C for 30 minutes. The cells were then washed two times, followed by 30-minute

222 incubation with PE-goat-anti-mouse IgG (H+L) antibody (Jackson ImmunoResearch, PA, USA) at 4°C.  
223 The cells were washed twice and resuspended in 300 µl of staining buffer containing 7-AAD (Biolegend,  
224 CA, USA) for flow cytometry analysis (Thermo Fisher Attune NxT - 14 color analyzer, Thermo Fisher  
225 Attune NxT software v2.2, FlowJo 10.6.1).

226

### 227 *Immunization*

228 Group of BALB/c mice were respectively immunized intramuscularly with two doses of WT (10 µg per  
229 dose), Delta (10 µg per dose), Omicron (10 µg per dose), Hybrid (10 µg per dose), and bivalent (5 µg of  
230 both Delta and Omicron RBD mRNA per dose) with an interval of 2 weeks. The serum samples were  
231 collected from the mice 1 week post last immunization.

232

### 233 *SARS-CoV-2 pseudovirus neutralization assay*

234 293T cells that stably expressed human ACE2 (293T-hACE2) and lentiviral-based pseudotyped  
235 SARS-CoV-2 viruses were provided by National RNAi Core Facility (Academia Sinica, Taiwan). One  
236 day before neutralization assay, 293T-hACE2 cells were seeded into 96-well black plate (Perkin Elmer,  
237 MA, USA) at a density of  $1 \times 10^4$  cells per well at 37°C. Mouse sera were inactivated at 56°C for 30  
238 minutes and performed four-fold serial dilutions with culture medium before incubation with indicated  
239 SARS-CoV-2 pseudovirus for an hour. The mixtures were then added to pre-seeded 293T-hACE2 cells  
240 and incubated for 3 days. Luciferase activity was measured by Luciferase Assay kit (Promega, WI, USA).  
241 The 50% neutralization titer (NT50) was calculated by nonlinear regression using Prism software version  
242 8.1.0 (GraphPad Software Inc.).

243

### 244 *Statistical analysis*

245 Results are presented as the mean ± standard deviation (SD). Differences between experimental groups of  
246 animals were analyzed by one-way ANOVA with Tukey's comparison.  $p < 0.05$  was considered as

247 statistically significant.

248

249

## Acknowledgments

250 We thank all study participants who devoted time to our research and Dr. James C. Liao for helpful  
251 discussions and advice. We thank the Academia Sinica SPF Animal Facility (AS-CFII-111-204) for  
252 providing animal support, Flow Cytometry Core Facility of Institute of Biomedical Sciences, Academia  
253 Sinica (AS-CFII108-113) for supplying flow cytometry instrumentation, DNA Sequencing Core Facility  
254 of Institute of Biomedical Sciences, Academia Sinica (AS-CFII-111-211) for sequencing support,  
255 National RNAi Core Facility at Academia Sinica for providing 293T-hACE2 cell line and SARS-CoV-2  
256 pseudovirus. This work was supported by Academia Sinica Biomedical Translation Research Center grant  
257 AS-KPQ-110-EIMD and AS-KPQ-111-KNT.

258

259

## Author contributions

260 M.H.T., I.J.L., P.Y.W. conceived and designed the project. M.H.T. provided overall instruction for the  
261 study and supervised the project. I.J.L. coordinated the experiments. I.J.L., Y.H.L., Y.S.L., H.F.C., and  
262 T.Y.C. performed animal experiments. S.C.T. was responsible for construction of mRNA expression  
263 vectors. Y.W.C. and C.C.L. performed RNA in vitro transcription. C.M.C. and M.K. packaged  
264 mRNA-LNPs. Y.C.C. provided VSV-based pseudotyped SARS-CoV-2. H.T.L. and W.Y.C. produced  
265 monoclonal antibodies for ELISA. I.J.L., Y.H.L., P.Y.W., S.I.T., C.W.C., C.H.H., and C.Y.C. conducted  
266 cell-based binding assay and pseudovirus neutralization assay. I.J.L., M.H.T., and P.Y.W. analyzed the  
267 data. H.C.W., C.P.C., and C.C.L. provided consultations. C.P.C. and Y.J.L. wrote the original draft with  
268 input from the team. I.H.W., W.C.L., and M.H.T. reviewed and edited the manuscript.

269

270

## Conflict of interest

271 The authors declare no conflict of interest.

272

273

## References

- 274 1 Garcia-Montero, C. *et al.* An Updated Review of SARS-CoV-2 Vaccines and the Importance of  
275 Effective Vaccination Programs in Pandemic Times. *Vaccines* **9**, doi:10.3390/vaccines9050433  
276 (2021).
- 277 2 Freer, G., Lai, M., Quaranta, P., Spezia, P. G. & Pistello, M. Evolution of viruses and the  
278 emergence of SARS-CoV-2 variants. *New Microbiol* **44** (2021).
- 279 3 Cele, S. *et al.* Escape of SARS-CoV-2 501Y.V2 from neutralization by convalescent plasma.  
280 *Nature* **593**, 142-146, doi:10.1038/s41586-021-03471-w (2021).
- 281 4 Collier, D. A. *et al.* Sensitivity of SARS-CoV-2 B.1.1.7 to mRNA vaccine-elicited antibodies.  
282 *Nature* **593**, 136-141, doi:10.1038/s41586-021-03412-7 (2021).
- 283 5 Lopez Bernal, J. *et al.* Effectiveness of Covid-19 Vaccines against the B.1.617.2 (Delta) Variant. *N*  
284 *Engl J Med* **385**, 585-594, doi:10.1056/NEJMoa2108891 (2021).
- 285 6 Sheikh, A. *et al.* SARS-CoV-2 Delta VOC in Scotland: demographics, risk of hospital admission,  
286 and vaccine effectiveness. *Lancet* **397**, 2461-2462, doi:10.1016/S0140-6736(21)01358-1 (2021).
- 287 7 Cameroni, E. *et al.* Broadly neutralizing antibodies overcome SARS-CoV-2 Omicron antigenic  
288 shift. *Nature*, doi:10.1038/s41586-021-04386-2 (2021).
- 289 8 VanBlargan, L. A. *et al.* An infectious SARS-CoV-2 B.1.1.529 Omicron virus escapes  
290 neutralization by therapeutic monoclonal antibodies. *Nat Med*, doi:10.1038/s41591-021-01678-y  
291 (2022).
- 292 9 Cele, S. *et al.* SARS-CoV-2 Omicron has extensive but incomplete escape of Pfizer BNT162b2  
293 elicited neutralization and requires ACE2 for infection. *medRxiv*,  
294 doi:10.1101/2021.12.08.21267417 (2021).
- 295 10 Dejnirattisai, W. *et al.* Reduced neutralisation of SARS-CoV-2 omicron B.1.1.529 variant by  
296 post-immunisation serum. *Lancet* **399**, 234-236, doi:10.1016/S0140-6736(21)02844-0 (2022).
- 297 11 Carreno, J. M. *et al.* Activity of convalescent and vaccine serum against SARS-CoV-2 Omicron.  
298 *Nature*, doi:10.1038/s41586-022-04399-5 (2021).
- 299 12 Sievers, B. L. *et al.* Antibodies elicited by SARS-CoV-2 infection or mRNA vaccines have  
300 reduced neutralizing activity against Beta and Omicron pseudoviruses. *Sci Transl Med*, eabn7842,  
301 doi:10.1126/scitranslmed.abn7842 (2022).
- 302 13 Cele, S. *et al.* Omicron extensively but incompletely escapes Pfizer BNT162b2 neutralization.  
303 *Nature*, doi:10.1038/s41586-021-04387-1 (2021).
- 304 14 Dejnirattisai, W. *et al.* SARS-CoV-2 Omicron-B.1.1.529 leads to widespread escape from  
305 neutralizing antibody responses. *Cell*, doi:10.1016/j.cell.2021.12.046 (2022).
- 306 15 Cao, Y. *et al.* Omicron escapes the majority of existing SARS-CoV-2 neutralizing antibodies.  
307 *Nature*, doi:10.1038/s41586-021-04385-3 (2021).
- 308 16 Suryawanshi, R. K. *et al.* Limited cross-variant immunity after infection with the SARS-CoV-2  
309 Omicron variant without vaccination. *medRxiv*, doi:10.1101/2022.01.13.22269243 (2022).

310

## Figure legends

311

312 *Fig. 1 RBD mRNA constructs and RBD-LNP vaccines*

313 (A) Mutation sites of wildtype (WT), Delta, Omicron, and Hybrid RBD mRNA constructs. UTR,  
314 untranslated region. SP, signal peptide. (B) Fragment analysis of RNA identity and integrity of in vitro  
315 transcribed WT, Delta, Omicron, and Hybrid RBD mRNA. LM, lower marker. (C) FACS analysis of  
316 RBD binding against human ACE2 or mouse ACE2 of indicated RBD mRNA in transfected cell  
317 supernatants. (D) Schematic illustration of WT, Delta, Omicron, Hybrid, and Delta/Omicron bivalent  
318 RBD-LNP and FACS analysis of RBD expression of indicated RBD-LNP in transfected cell supernatants.

319

320 *Fig. 2 Neutralization capacity of various RBD-LNP vaccine immunized mouse sera against D614G, Beta,*  
321 *Delta, and Omicron SARS-CoV-2 pseudovirus variants*

322 (A-E) Neutralization curves (left panel) and summarized NT50 values (right panel) of vaccinated mouse  
323 sera against pseudotyped SARS-CoV-2 and the variants. Mean NT50 titers are shown above each column.  
324 Dashed lines indicate the limit of detection. NT50, 50% neutralization titer. Data are presented as mean  $\pm$   
325 SD. *p* value were calculated by one-way ANOVA.

326

327 *Sup. 1 Summary bar plot of RNA integrity*

328 (A) Fragment analysis of RNA integrity of in vitro transcribed WT, Delta, Omicron, and Hybrid RBD  
329 mRNA. H.M.W, high molecular weight. The percentages are shown above each column.

330

331 *Sup. 2 Basic characteristics of various RBD-LNP*

332 (A) The summary table of size, polydispersity index (pDI), and zeta potential of indicated RBD-LNP. Data  
333 are presented as mean  $\pm$  SD.

334

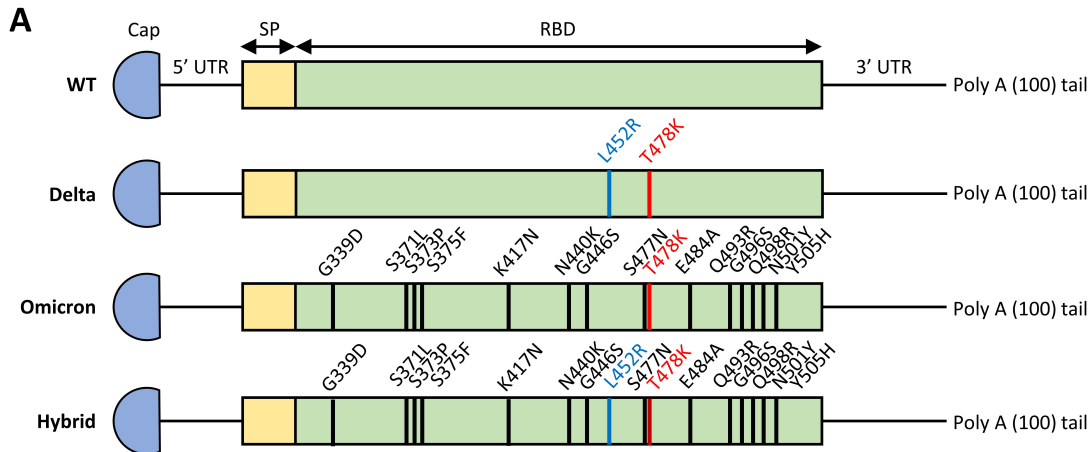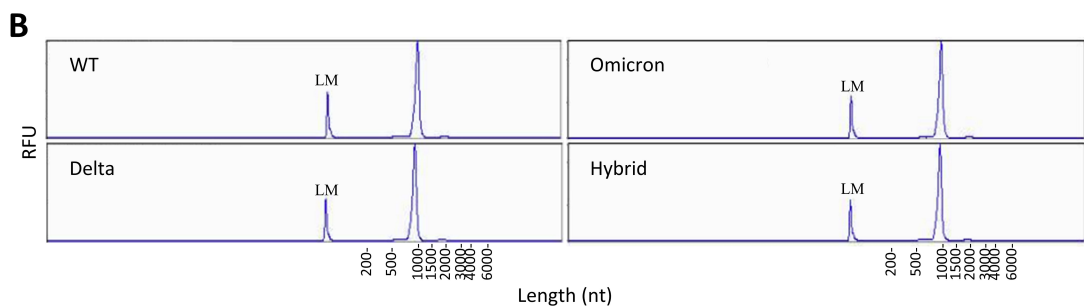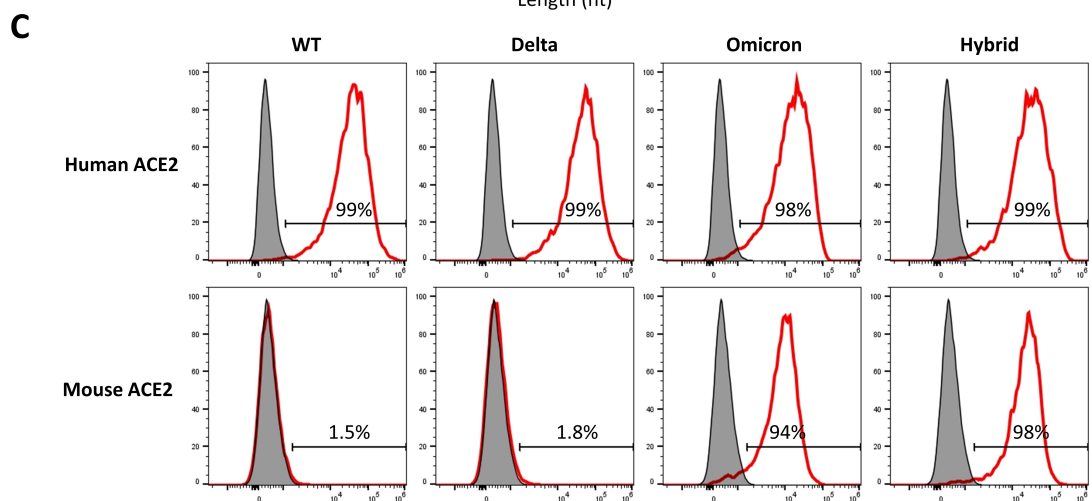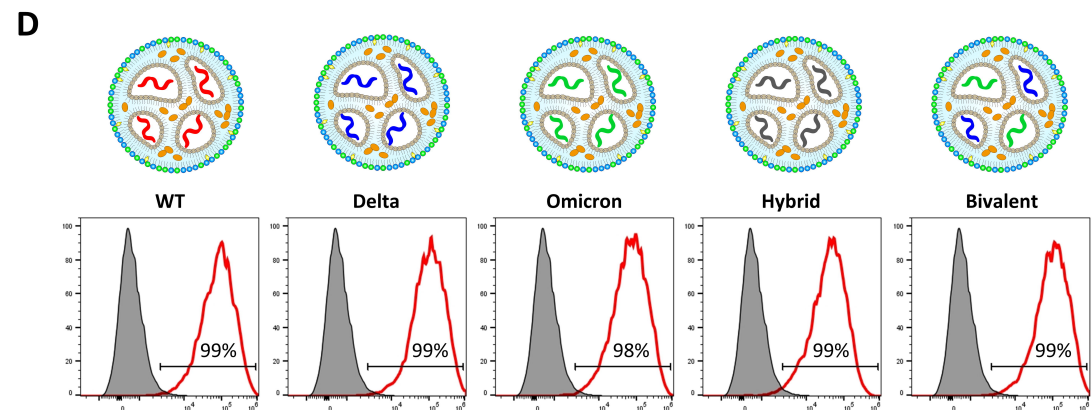

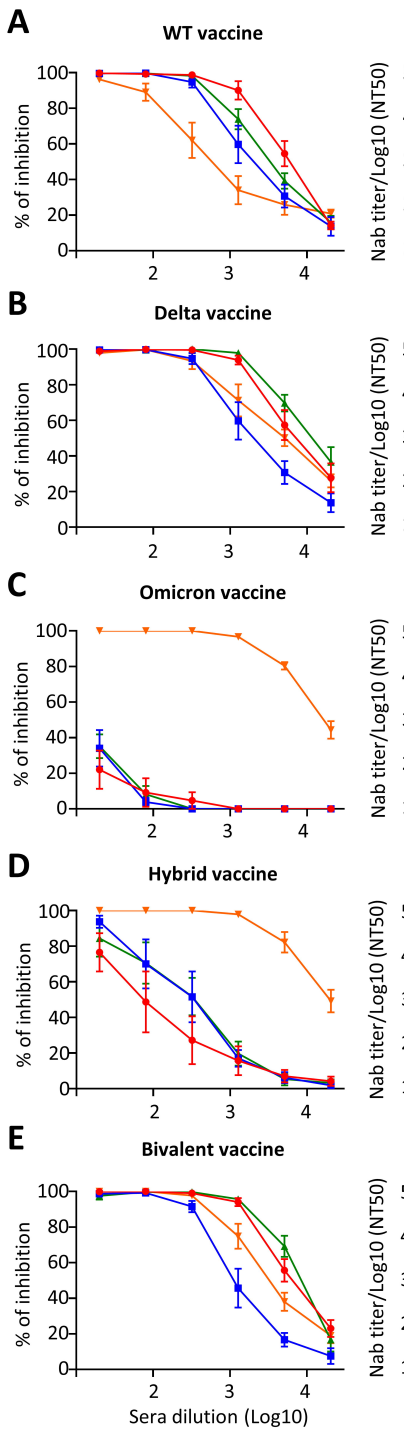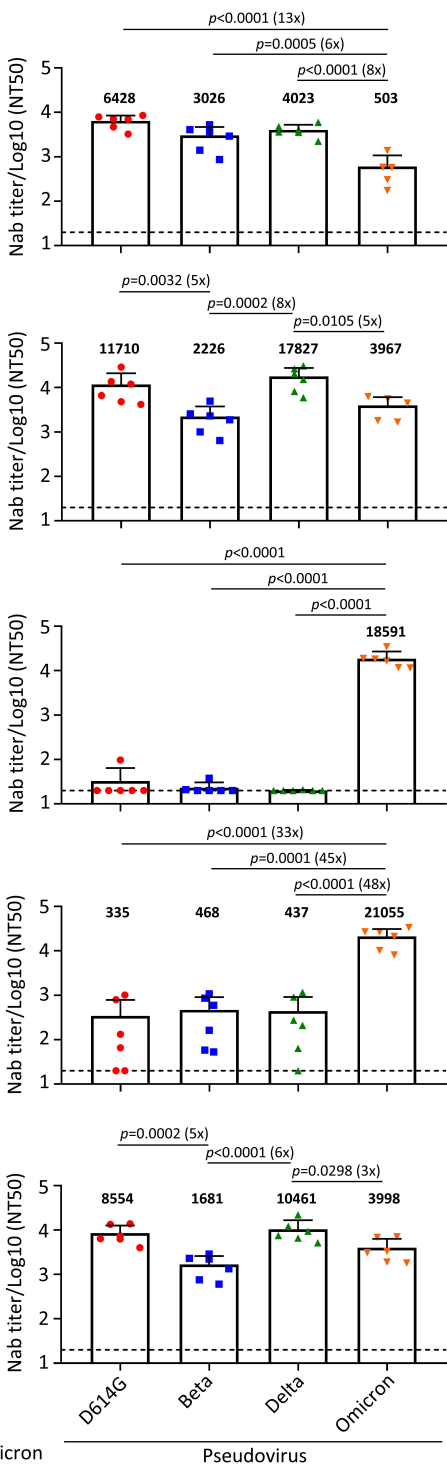

Source: https://www.biorxiv.org/content/10.1101/2022.01.31.478406v1.full.pdf?utm_source=MaconMedia.com&utm_campaign=COVID_Update
